# Supplementary material
Source: PubMed Central journal article supplement (PMC3992675)
Supplement: 1402723111_pnas.201402723SI.pdf [file 1402723111_pnas.201402723SI.pdf]

# Supporting Information

Juhas et al. 10.1073/pnas.1402723111

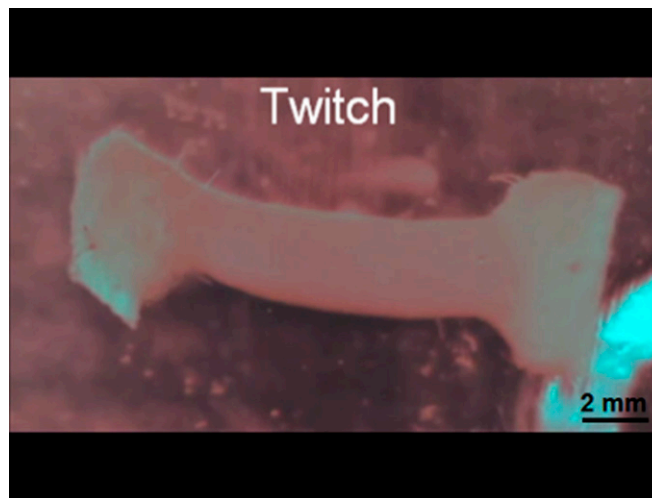

**Movie S1.** Engineered muscle contractions. Representative twitch and tetanus contractions of an unloaded, 2-wk-old engineered muscle bundle electrically stimulated by a single pulse (10-ms duration, 3 V/mm) or a 40-Hz pulse train, respectively. During culture, ends of the engineered muscle were attached to rectangular Velcro felts.

[Movie S1](#)

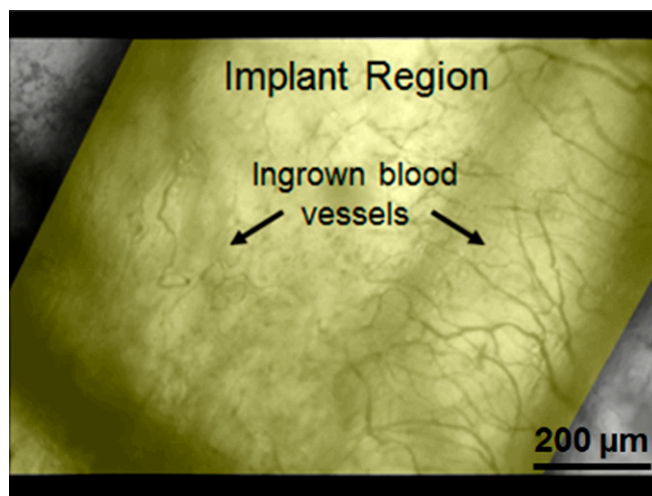

**Movie S2.** Ingrown neovasculature within implanted engineered muscle. Representative intravital recordings of ingrown neovasculature within the implanted engineered muscle (yellow pseudocolor region) at 7 and 14 d postimplantation. Red blood cell flow through the ingrown vessels and spontaneous contractions of engineered muscle are readily observed.

[Movie S2](#)
